# Supplementary material
Source: Springer Nature journal article supplement (https://www.springermedizin.de/resource/supplementary/12986_2013_588_MOESM9_ESM.pdf/25655086)

Relative mRNA level

- NC (n=5)
- HF (n=5)
- HFM (n=6)

6  
5  
4  
3  
2  
1  
0

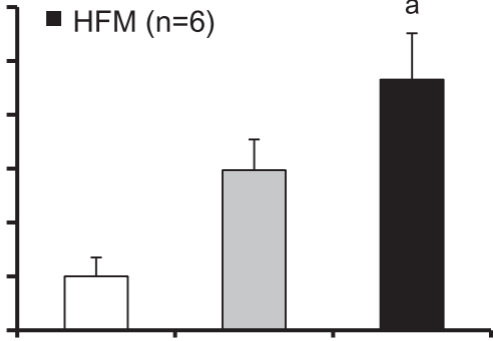

GK

Supplement: MOESM9 [file 25655086]
